# Supplementary material
Source: MDPI journal article supplement (https://www.mdpi.com/2304-6740/10/12/250)
Supplement: s1 [file s1]

Supplemental information

# Mesoporous Silica Nanoparticles for pH-responsive delivery of Iridium Metallotherapeutics and Treatment of Glioblastoma Multiforme

Nikola Ž. Knežević,<sup>1\*</sup> Nebojša Ilić,<sup>2</sup> and Goran N. Kaluđerović<sup>3\*</sup>

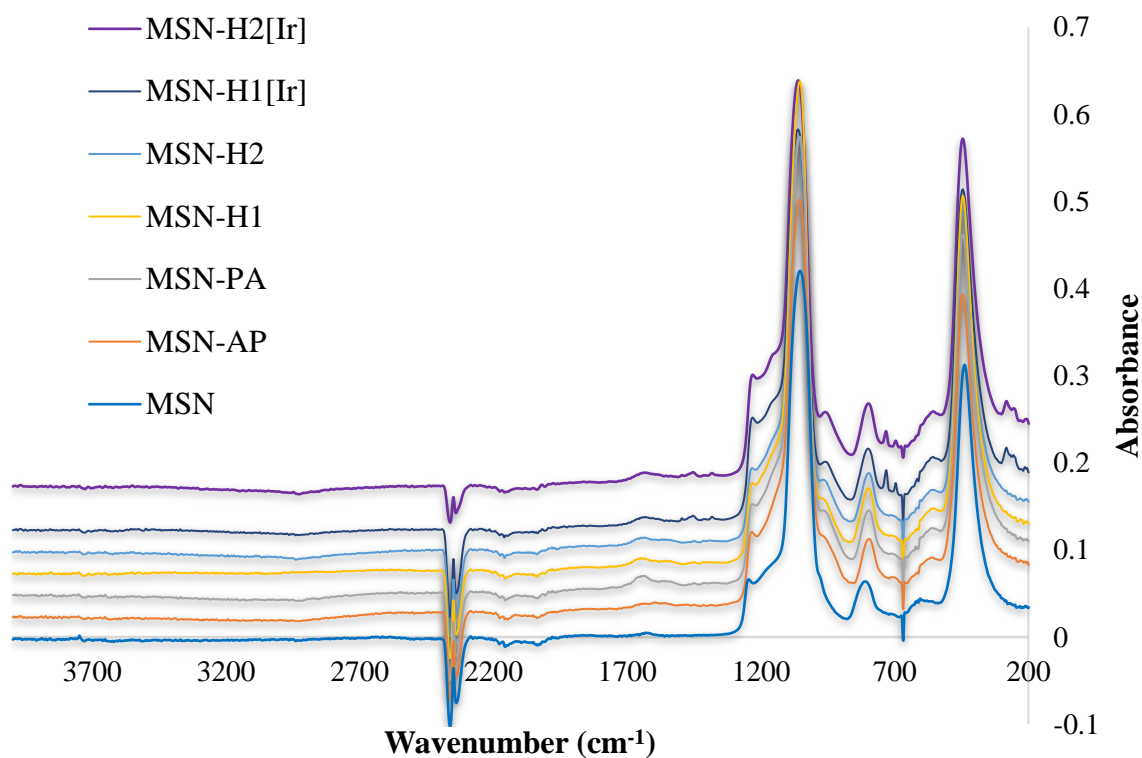

**Figure S1.** FTIR spectra of the prepared materials

Cell line: **U251**

**MRC-5**

**MSN-H1[Ir] pH 5**

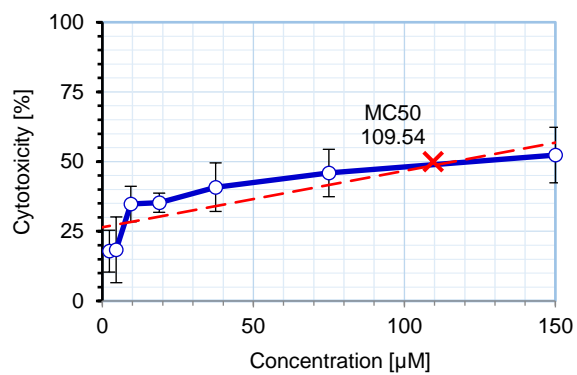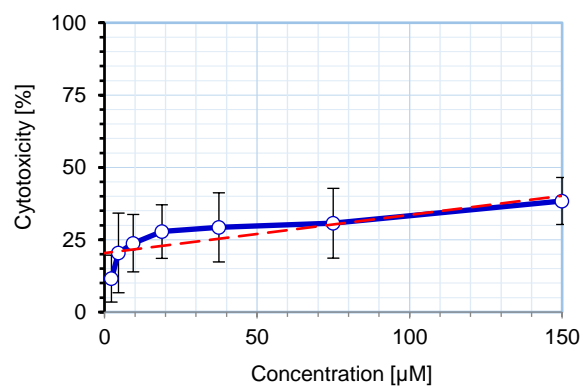

**MSN-H1[Ir] pH 7.4**

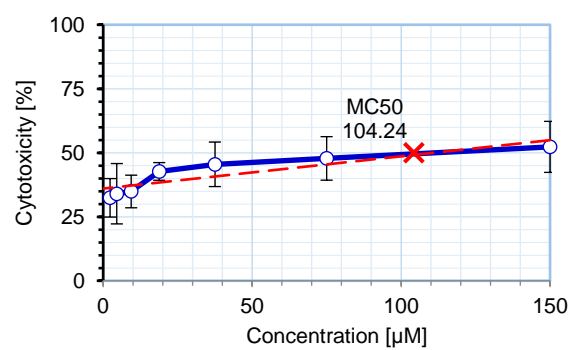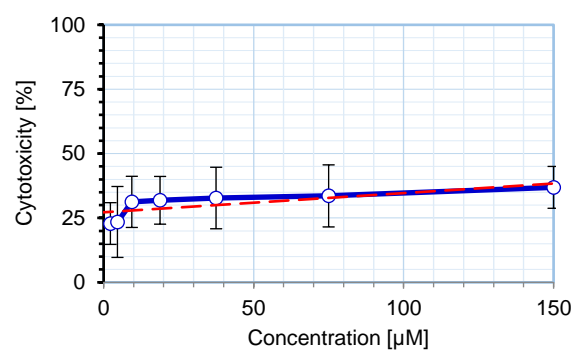

**MSN-H1[Ir] Medium**

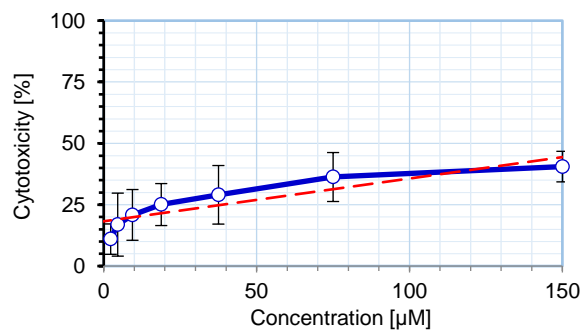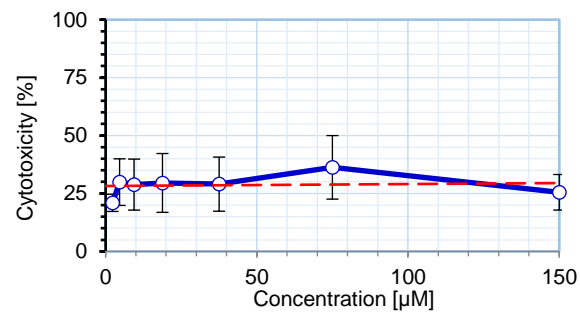

**Figure S2.** Cytotoxicity of MSN-H1[Ir] against U251 and MRC-5 cells

Cell line: **U251**

**MRC-5**

**MSN-H2[Ir] pH 5**

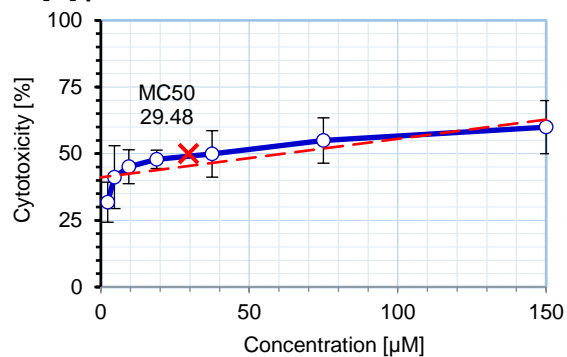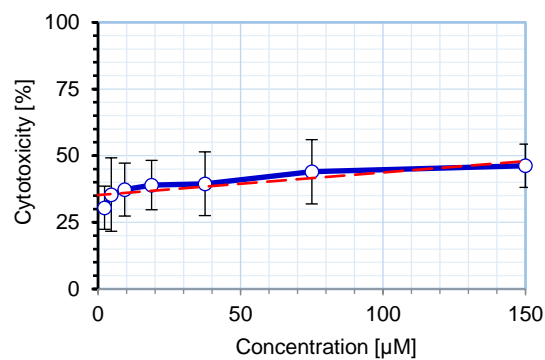

**MSN-H2[Ir] pH 7.4**

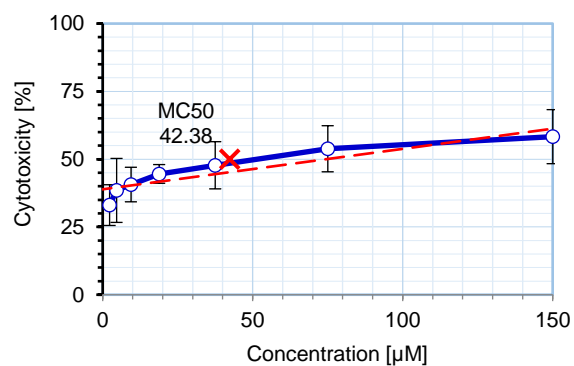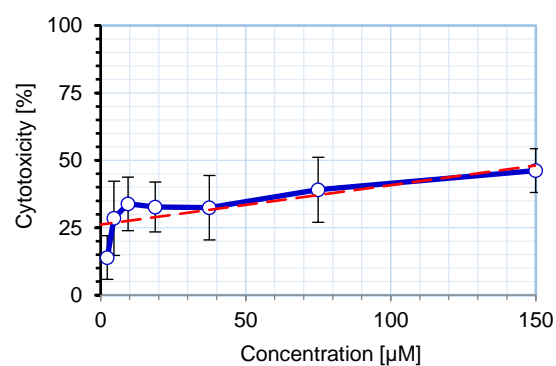

**MSN-H2[Ir] Medium**

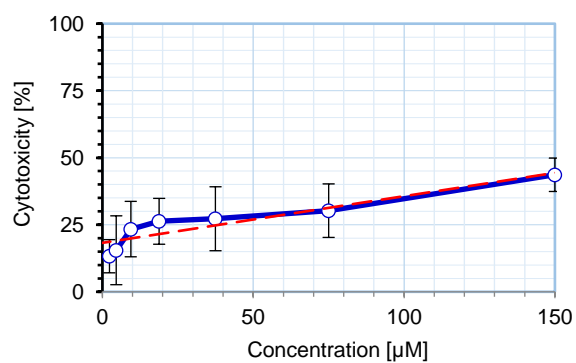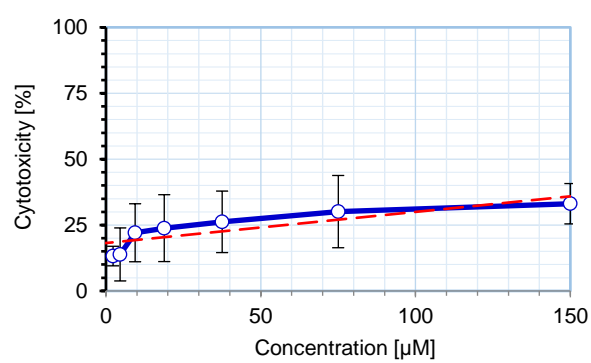

**Figure S3.** Cytotoxicity of MSN-H2[Ir] against U251 and MRC-5 cells

Cell line:

U251

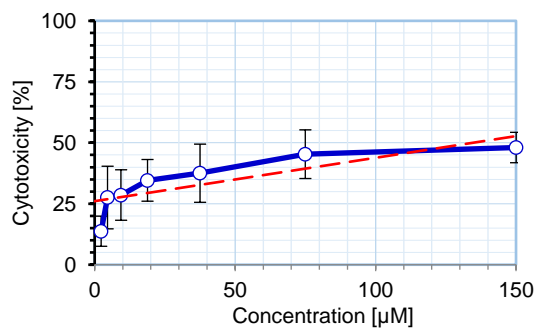

MRC-5

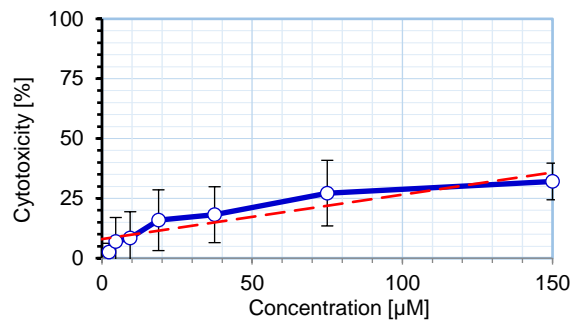

**Figure S4.** Cytotoxicity of (Pentamethylcyclopentadienyl)iridium(III) chloride dimer ( $[\text{Ir}]_2$ ), with stock solution prepared in DMSO, against U251 and MRC-5 cells

Cell line:

U251

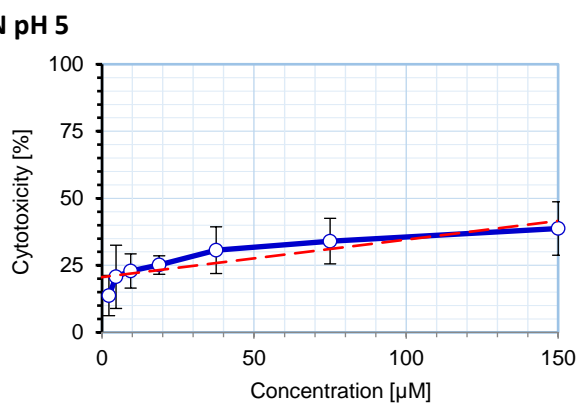

MRC-5

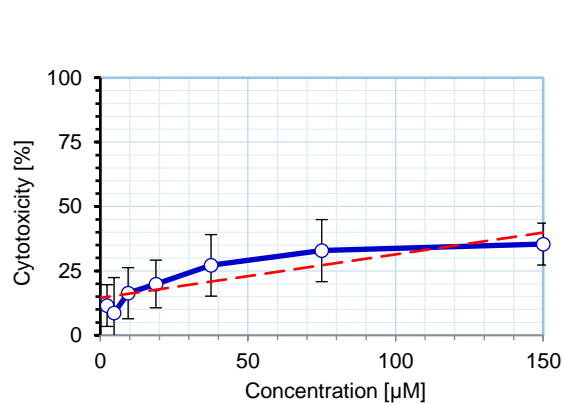

MSN pH 7.4

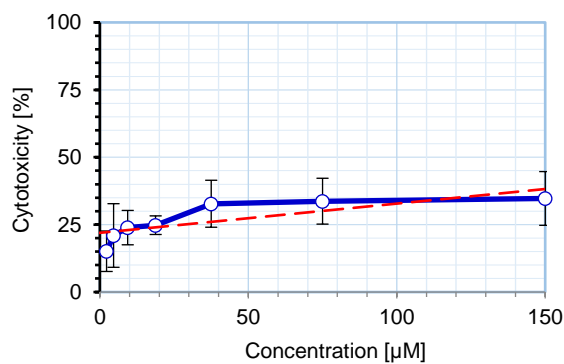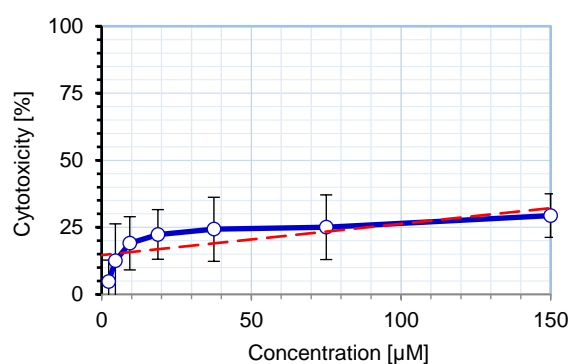

**Figure S5.** Cytotoxicity of MSN against U251 and MRC-5 cells

Cell line: **U251**

**MRC-5**

**MSN-H1 pH 5**

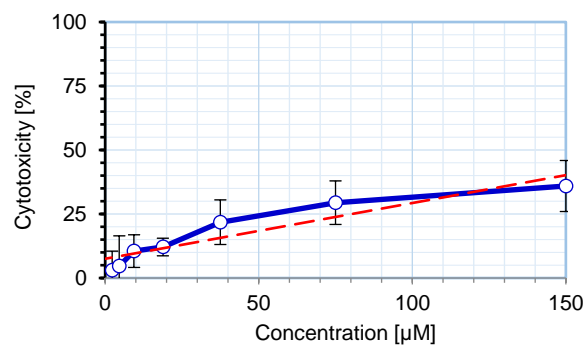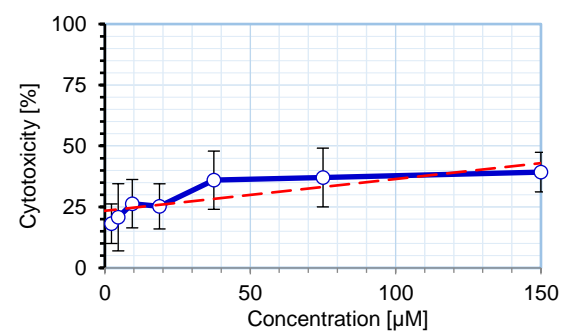

**MSN-H1 pH 7.4**

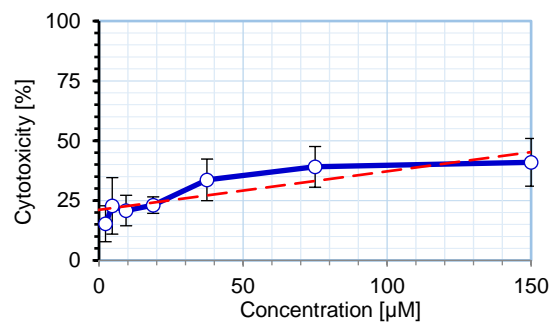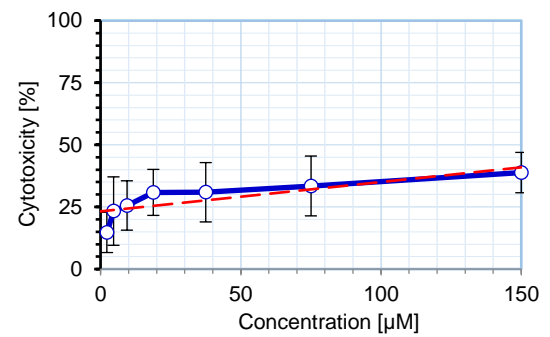

**Figure S6.** Cytotoxicity of MSN-H1 against U251 and MRC-5 cells

Cell line: **U251**

**MRC-5**

**MSN-H2 pH 5**

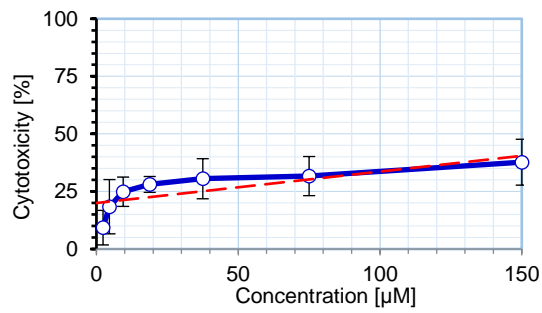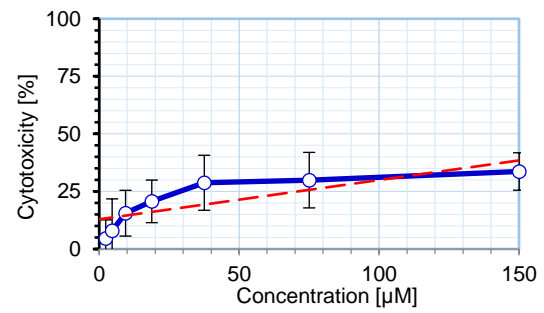

**MSN-H2 pH 7.4**

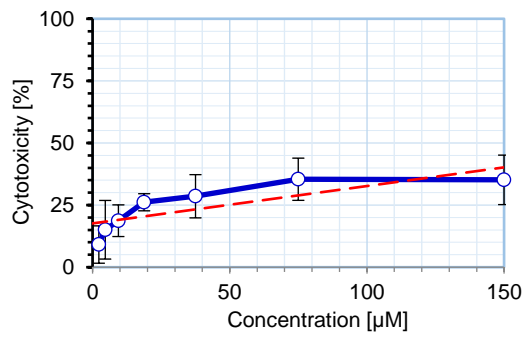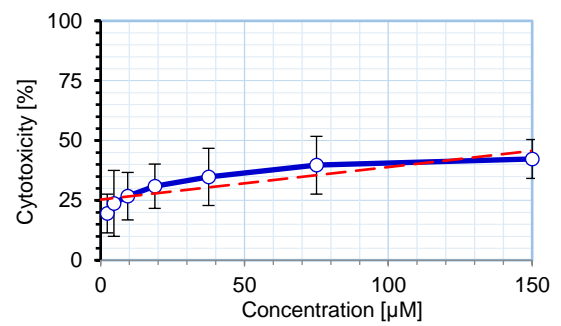

**Figure S7.** Cytotoxicity of MSN-H2 against U251 and MRC-5 cells
